# Supplementary material for: p66ShcA potentiates the cytotoxic response of triple negative breast cancers to PARP inhibitors
Source: JCI journal article supplement (doi:10.1172/jci.insight.138382), 2021-01-20
Supplement: sd1 [file 1]

You are being redirected.
